# Supplementary material for: Performance of Bayesian Additive Regression Trees (BART)-Survival implementation in Python: A Comparison with Traditional and R-Based BART Survival Analysis Methods
Source: Research Square preprint supplement (doi:10.21203/rs.3.rs-8605537/v1), 2026-01-23
Supplement: Supplementary file 1 [file 3fa5180b464a48ae8ddf073d.xlsx]

## Sheet: S1
Supplemental Table 1		Performance of the p-BART,r-BART and KM methods in a One Sampling distribution and Two Sampling Distribution Simulation Settings. Average RMSE, bias, and Uncertainty Interval Width are derived from the 100 iterations, along with Coverage Probability. Metrics are provided for each of the time percentiles of the full survival time distribution (0.1, 0.3, 0.5, 0.7, 0.9) for both 20% censoring and 50…
					Time Percentiles
					0.1	0.3	0.5	0.7	0.9	0.1	0.3	0.5	0.7	0.9	Row mean	Row Standard Deviation
			met	model	20% Censoring					50% Censoring
		One Sampling Distribution	a-RMSE	p-BART	0.0118687	0.0255396	0.0251806	0.0222377	0.0183774	0.015551	0.034675	0.0343453	0.0415586	0.0308568	0.0260191	0.00938422
				r-BART	0.0118113	0.0255026	0.025384	0.0217631	0.0183778	0.0155193	0.0345961	0.0358231	0.040216	0.031143	0.0260136	0.00934979
				KM	0.0120935	0.0257726	0.0258497	0.0216833	0.0184097	0.0163142	0.0348155	0.0371022	0.0392674	0.0311299	0.0262438	0.00922704
			a-bias	p-BART	-0.000590722	-0.00403798	-0.00117017	-0.00751016	-0.00468212	-0.0109065	-0.0209237	-0.0161108	-0.0299753	-0.0165736	-0.0112481	0.00954906
				r-BART	-0.00123014	-0.00357001	-0.00364911	-0.00559079	-0.00437972	-0.0109867	-0.0209095	-0.0188077	-0.0281746	-0.0167713	-0.011407	0.00921083
				KM	-0.00227372	-0.00376396	-0.00530304	-0.00448635	-0.00403789	-0.0119987	-0.0209199	-0.020936	-0.02634	-0.0159141	-0.0115974	0.00885616
			Coverage Probability	p-BART	0.99	0.95	0.97	0.96	0.96	0.89	0.82	0.89	0.82	0.85	0.91	0.064291
				r-BART	0.99	0.92	0.95	0.95	0.93	0.88	0.84	0.92	0.84	0.92	0.914	0.0481202
				KM	0.99	0.93	0.95	0.98	0.95	0.91	0.88	0.91	0.84	0.92	0.926	0.0450185
			a-Uncertainty Interval Width	p-BART	0.0603503	0.111939	0.120708	0.10194	0.0806008	0.0498721	0.105991	0.122897	0.114824	0.0980538	0.0967177	0.0251934
				r-BART	0.0507539	0.0906421	0.100077	0.085696	0.0683937	0.0472563	0.100211	0.119604	0.113643	0.0985164	0.0874794	0.024728
				KM	0.05181	0.0920951	0.101315	0.0867843	0.0690234	0.0486468	0.102151	0.121354	0.11527	0.100366	0.0888815	0.024979
		Two Sampling Distribution	a-RMSE	p-BART	0.0201364	0.0311066	0.0346307	0.0312631	0.0296522	0.0205417	0.0348849	0.0508656	0.0699724	0.0685508	0.0391604	0.0179975
				r-BART	0.0197536	0.0311604	0.0364679	0.0322137	0.0261931	0.0208073	0.0354992	0.0530554	0.0696964	0.0622076	0.0387055	0.0172213
				KM	0.0197283	0.0319209	0.0380385	0.0332061	0.0248827	0.0206317	0.0366907	0.0555952	0.0710794	0.059944	0.0391718	0.0174511
			a-bias	p-BART	-0.000443739	0.00318871	-0.00227553	-0.0117206	-0.0155275	-0.00855004	-0.0099592	-0.0302712	-0.0587649	-0.0598191	-0.0194143	0.0229617
				r-BART	-0.00142456	-0.000802879	-0.00499453	-0.0106173	-0.0111848	-0.00890685	-0.0122678	-0.0320254	-0.0569793	-0.0517687	-0.0190972	0.0205494
				KM	-0.00192758	-0.00262868	-0.00627875	-0.0102259	-0.00917393	-0.00939378	-0.014342	-0.0334165	-0.0564947	-0.0464993	-0.0190381	0.0193756
			Coverage Probability	p-BART	0.97	0.96	0.955	0.99	0.795	0.94	0.91	0.855	0.7	0.48	0.8555	0.160199
				r-BART	0.98	0.935	0.94	0.955	0.885	0.95	0.92	0.85	0.72	0.64	0.8775	0.111959
				KM	0.975	0.93	0.945	0.965	0.905	0.98	0.92	0.845	0.775	0.72	0.896	0.0884998
			a-Uncertainty Interval Width	p-BART	0.0923961	0.134597	0.158697	0.140125	0.100113	0.0796767	0.122598	0.157967	0.161898	0.144505	0.129257	0.0295262
				r-BART	0.0794459	0.112899	0.138203	0.123861	0.0861097	0.0771176	0.118598	0.155798	0.163949	0.147307	0.120329	0.0316022
				KM	0.0835847	0.116424	0.141308	0.127856	0.0873459	0.0811996	0.122467	0.161129	0.171361	0.155247	0.124792	0.0329557

## Sheet: S2
Supplemental Table 2		Performance of the p-BART,r-BART and CPHM methods in a multiple regression simulation setting with Proportional and non-Proportional Hazards. Average RMSE, and bias are derived from the 200 iterations. Metrics are provided for each of the time percentiles of the full survival time distribution (0.1, 0.25, 0.5, 0.75, 0.9) along with the metric average across all recorded times.
				Time Percentils					Row Average
				0.1	0.25	0.5	0.75	0.9
	Proportional Hazards	a-RMSE	p-BART	0.0368399	0.0529086	0.0613547	0.0600473	0.0484615	0.0519224
			r-BART	0.0376937	0.0550419	0.0611215	0.061284	0.049917	0.0530116
			CPHM	0.0246816	0.0431684	0.0482085	0.0478199	0.0422687	0.0412294
		a-bias	p-BART	0.00924552	0.00555597	-0.00638696	-0.0187575	-0.0200687	-0.00608233
			r-BART	0.00573618	0.000384919	-0.0121593	-0.0198063	-0.0179039	-0.00874969
			CPHM	-0.00132026	-0.00392535	-0.00847744	-0.00696342	-0.00502701	-0.00514269
	Non-Proportional Hazards	a-RMSE	p-BART	0.00863188	0.00198686	-0.0140706	-0.0287212	-0.0264847	-0.0117315
			r-BART	0.00404443	-0.00164154	-0.0178134	-0.0303201	-0.0268513	-0.0145164
			CPHM	-0.00141835	0.00380327	0.0163175	0.00571067	-0.012541	0.00237442
		a-bias	p-BART	0.0375993	0.0663021	0.0704405	0.0676234	0.064789	0.0613509
			r-BART	0.0375638	0.0584195	0.0690476	0.0723476	0.0600234	0.0594804
			CPHM	0.06716	0.13392	0.109101	0.0668574	0.0819441	0.0917966

## Sheet: S3
Supplemental Table 3		Out-of-sample performance of the p-BART, r-BART and CPHM methods in a complex multiple regression simulation setting. Average RMSE, and bias are derived from the 10 iterations. Metrics are provided for each of the time percentiles of the full survival time distribution (0.1, 0.3, 0.5, 0.7 0.9) and with the three sample sizes N=400, 1000, 4000.
				Time Percentiles
			deciles	0.1	0.3	0.5	0.7	0.9
	N=400	a-RMSE	p-BART	0.0327803	0.0715392	0.0860875	0.111951	0.105969	0.0816653
			r-BART	0.036248	0.0696282	0.0927131	0.108227	0.0951099	0.0803853
			CPHM	0.0572552	0.130959	0.152705	0.205037	0.225527	0.154296
		a-Bias	p-BART	0.00705878	0.00365983	-0.000564591	-0.00808528	-0.0128337	-0.00215299
			r-BART	0.0034099	0.00417755	-0.00401397	-0.00810968	-0.0179786	-0.00450297
			CPHM	-0.00563448	-0.00242474	-0.00478442	-0.000250488	-0.0184287	-0.00630456
	N=1000	a-RMSE	p-BART	0.0248241	0.0559116	0.0670272	0.0950574	0.0928247	0.067129
			r-BART	0.0271673	0.051593	0.0709138	0.0830814	0.072352	0.0610215
			CPHM	0.0552952	0.127209	0.142405	0.188545	0.208185	0.144328
		a-Bias	p-BART	0.00935244	0.00557848	0.00666967	-0.00356038	-0.00573518	0.00246101
			r-BART	0.0032142	0.00251665	0.00383135	0.000491021	-0.00428096	0.00115445
			CPHM	0.000340475	0.00296083	0.00845434	0.0061879	-0.000548147	0.00347908
	N=4000	a-RMSE	p-BART	0.0166382	0.0471491	0.0597228	0.0961127	0.0966046	0.0632455
			r-BART	0.0144108	0.0265375	0.0388138	0.0472069	0.0389699	0.0331878
			CPHM	0.0546758	0.126717	0.141155	0.185646	0.205655	0.14277
		a-Bias	p-BART	0.00552547	-0.00124965	-0.00244775	-0.00643192	-0.00401364	-0.0017235
			r-BART	-0.000783991	-0.00483084	-0.0072202	-0.00342555	-0.00281476	-0.00381507
			CPHM	-3.58763e-05	-0.000254865	0.00241283	0.00787885	0.00598552	0.00319729

## Sheet: S4
Supplemental Table 4		Estimated Survival Functions for Respiratory Post-Acute COVID-19 Sequelae in Patients with Severe COVID-19 (Inpatients) compared to patients without Severe COVID019 (Outpatients) using p-BART, r-BART, and Cox Proportional Hazards Model (CPHM) — United States, October 2021–October 2022. Survival Probability plot at time in days (t=90,180,270,360) for marginal estimates of the conditions Outpatient…
				Time(days)
				90			180			270			360
				Marginal Survival(t)	Lower CI (0.05)	Upper CI (0.95)	Marginal Survival(t)	Lower CI (0.05)	Upper CI (0.95)	Marginal Survival(t)	Lower CI (0.05)	Upper CI (0.95)	Marginal Survival(t)	Lower CI (0.05)	Upper CI (0.95)
		p-BART	Outpatient	0.899278	0.890571	0.909151	0.845269	0.833577	0.857632	0.79702	0.783156	0.810651	0.761045	0.747132	0.775355
			Inpatient	0.853025	0.821163	0.883269	0.777874	0.732337	0.81975	0.715453	0.66047	0.768202	0.670692	0.60963	0.732288
		r-BART	Outpatient	0.872814	0.858474	0.885727	0.807878	0.788719	0.825392	0.751804	0.728577	0.774705	0.704942	0.679702	0.729274
			Inpatient	0.85805	0.837461	0.879129	0.785961	0.757875	0.815595	0.724407	0.689131	0.761473	0.673677	0.634284	0.713608
		CPHM	Outpatient	0.900019			0.849004			0.801076			0.763926
			Inpatient	0.848625			0.777118			0.712958			0.665067
			Credible Interval
		Hazard Ratio	Mean	0.05	0.95
		p-BART	1.61522	1.12089	2.21643
		r-BART	1.50971	1.15035	1.93921
			Confidence Interval
				0.025	0.975
		CPHM	1.59882	1.31769	1.93993
			C-Index	t-AUC	i-Brier
		p-BART	0.7636	0.787581	0.1226
		r-BART	0.76404	0.7676	0.1087
		CPHM	0.744709	0.7805	0.1246
